# Supplementary material
Source: PubMed Central journal article supplement (PMC8349506)
Supplement: NIHMS1728931-supplement-Online_Resource_4.pdf [file NIHMS1728931-supplement-Online_Resource_4.pdf]

**Online Resource 4.** Main effects and interactions from two-way ANOVAs for skeletal outcomes that were assessed at a single timepoint (2-, 4-, 8-, or 12-weeks), and for serum measurements.

| OUTCOME                                   | MAIN EFFECT                                                                 | MAIN EFFECT                                                                                                                    | INTERACTION                                                            | TUKEY POST HOC |
|-------------------------------------------|-----------------------------------------------------------------------------|--------------------------------------------------------------------------------------------------------------------------------|------------------------------------------------------------------------|----------------|
| <i>Tibial Cancellous Histomorphometry</i> |                                                                             |                                                                                                                                |                                                                        |                |
| <b>BV/TV</b><br><br>%                     | <b>Group: p &lt; 0.001</b><br><br>SHAM: 7.5 ± 0.6<br><br>SCI: 3.5 ± 0.3     | <b>Time: p = 0.366</b><br><br>2 wk (a): 6.4 ± 0.8<br>1 mo (b): 5.6 ± 0.8<br>2 mo (c): 5.9 ± 1.0<br>3 mo (d): 4.7 ± 0.8         | <b>Interaction: p = 0.990</b><br><br>For Means ± SEM<br><br>see Fig 1A | NS             |
| <b>Tb.N</b><br><br>#/mm                   | <b>Group: p &lt; 0.001</b><br><br>SHAM: 1.20 ± 0.09<br><br>SCI: 0.67 ± 0.06 | <b>Time: p = 0.192</b><br><br>2 wk (a): 1.08 ± 0.10<br>1 mo (b): 0.98 ± 0.13<br>2 mo (c): 0.96 ± 0.14<br>3 mo (d): 0.77 ± 0.13 | <b>Interaction: p = 0.678</b><br><br>For Means ± SEM<br><br>see Fig 1B | NS             |
| <b>Tb.Th</b><br><br>µm                    | <b>Group: p &lt; 0.001</b><br><br>SHAM: 61.2 ± 1.6                          | <b>Time: p = 0.001</b><br><br>2 wk (a): 53.5 ± 1.8 <b>d*</b>                                                                   | <b>Interaction: p = 0.065</b><br><br>For Means ± SEM                   | NS             |

|                                |                                                                          |                                                                                                                                         |                                                                        |                                                                                                                               |
|--------------------------------|--------------------------------------------------------------------------|-----------------------------------------------------------------------------------------------------------------------------------------|------------------------------------------------------------------------|-------------------------------------------------------------------------------------------------------------------------------|
|                                | SCI: 52.6 ± 1.5                                                          | 1 mo (b): 54.8 ± 1.7 <b>d*</b><br>2 mo (c): 57.7 ± 1.9<br>3 mo (d): 65.2 ± 3.6                                                          | see Fig 1C                                                             |                                                                                                                               |
| <b>Tb.Sp</b><br><br><b>μm</b>  | <b>Group: p &lt; 0.001</b><br><br>SHAM: 924 ± 97<br><br>SCI: 2154 ± 369  | <b>Time: p = 0.061</b><br>2 wk (a): 953 ± 90<br>1 mo (b): 1980 ± 616<br>2 mo (c): 1710 ± 384<br>3 mo (d): 1527 ± 252                    | <b>Interaction p = 0.050</b><br><br>For Means ± SEM<br><br>see Fig 1D  | SHAM 2 wk < SCI 1 mo ‡<br>SCI 2 wk < SCI 1 mo †<br>SHAM 1 mo < SCI 1 mo ‡<br>SCI 1 mo > SHAM 2 mo †<br>SCI 1 mo > SHAM 3 mo † |
| <b>Oc.S/BS</b><br><br><b>%</b> | <b>Group: p = 0.858</b><br><br>SHAM: 3.84 ± 0.32<br><br>SCI: 3.95 ± 0.41 | <b>Time: p = 0.001</b><br>2 wk (a): 5.12 ± 0.62 <b>c*,d*</b><br>1 mo (b): 4.49 ± 0.47<br>2 mo (c): 2.85 ± 0.31<br>3 mo (d): 2.82 ± 0.31 | <b>Interaction: p = 0.778</b><br><br>For Means ± SEM<br><br>see Fig 1E | NS                                                                                                                            |
| <b>Ob.S/BS</b><br><br><b>%</b> | <b>Group: p = 0.290</b><br><br>SHAM: 9.6 ± 1.0<br><br>SCI: 11.0 ± 1.7    | <b>Time: p &lt; 0.001</b><br>2 wk (a): 1.7 ± 0.5 <b>b*,c*,d*</b><br>1 mo (b): 13.2 ± 2.0                                                | <b>Interaction: p = 0.159</b><br><br>For Means ± SEM<br><br>see Fig 1F | NS                                                                                                                            |

|                          |                                                                          |                                                                                                                                                    |                                                                           |                                                                                                                                                                                                                                      |
|--------------------------|--------------------------------------------------------------------------|----------------------------------------------------------------------------------------------------------------------------------------------------|---------------------------------------------------------------------------|--------------------------------------------------------------------------------------------------------------------------------------------------------------------------------------------------------------------------------------|
|                          |                                                                          | 2 mo (c): 13.0 ± 1.7<br>3 mo (d): 12.9 ± 1.8                                                                                                       |                                                                           |                                                                                                                                                                                                                                      |
| <b>MS/BS</b><br><br>%    | <b>Group: p = 0.032</b><br><br>SHAM: 31.7 ± 1.2<br><br>SCI: 25.7 ± 2.3   | <b>Time: p &lt; 0.001</b><br>2 wk (a): 19.8 ± 2.2 <b>b*,c*,d*</b><br>1 mo (b): 30.9 ± 2.2 <b>c</b><br>2 mo (c): 38.3 ± 2.1<br>3 mo (d): 31.0 ± 2.3 | <b>Interaction: p &lt; 0.001</b><br><br>For Means ± SEM<br><br>see Fig 1G | SHAM 2 wk > SCI 2 wk ‡<br>SHAM 2 wk < SCI 2 mo ‡<br>SCI 2 wk < <i>ALL OTHERS</i> ‡<br>SHAM 1 mo < SCI 2 mo †<br>SCI 2 mo > SCI 3 mo ‡                                                                                                |
| <b>MAR</b><br><br>µm/day | <b>Group: p = 0.896</b><br><br>SHAM: 0.94 ± 0.03<br><br>SCI: 0.90 ± 0.06 | <b>Time: p &lt; 0.001</b><br>2 wk (a): 0.77 ± 0.05<br>1 mo (b): 1.13 ± 0.06 <b>a*,c*,d*</b><br>2 mo (c): 0.91 ± 0.04<br>3 mo (d): 0.91 ± 0.04      | <b>Interaction: p &lt; 0.001</b><br><br>For Means ± SEM<br><br>see Fig 1H | SHAM 2 wk > SCI 2 wk †<br>SHAM 2 wk < SCI 1 mo ‡<br>SCI 2 wk < SHAM 1 mo ‡<br>SCI 2 wk < SHAM 3 mo ‡<br>SCI 2 wk < SCI 1 mo ‡<br>SCI 2 wk < SCI 2 mo ‡<br>SHAM 1 mo < SCI 1 mo †<br>SCI 1 mo > SHAM 2 mo ‡<br>SCI 1 mo > SHAM 3 mo ‡ |

|                                                           |                                                                |                                                                                                                                           |                                                                   |                                                                                   |
|-----------------------------------------------------------|----------------------------------------------------------------|-------------------------------------------------------------------------------------------------------------------------------------------|-------------------------------------------------------------------|-----------------------------------------------------------------------------------|
|                                                           |                                                                |                                                                                                                                           |                                                                   | SCI 1 mo > SCI 2 mo ‡<br>SCI 1 mo > SCI 3 mo ‡                                    |
| <b>BFR/BS</b><br>$\mu\text{m}^3/\mu\text{m}^2/\text{day}$ | <b>Group: p = 0.084</b><br>SHAM: 30.2 ± 1.7<br>SCI: 22.7 ± 2.3 | <b>Time: p &lt; 0.001</b><br>2 wk (a): 15.2 ± 2.6 <b>b*,c*,d*</b><br>1 mo (b): 33.1 ± 2.5<br>2 mo (c): 35.5 ± 3.0<br>3 mo (d): 28.0 ± 3.0 | <b>Interaction: p &lt; 0.001</b><br>For Means ± SEM<br>see Fig 1I | SHAM 2 wk < SCI 2 mo †<br>SCI 2 wk < <i>ALL OTHERS</i> ‡<br>SCI 2 mo > SCI 3 mo ‡ |
| <b><i>Tibial Cortical Histomorphometry</i></b>            |                                                                |                                                                                                                                           |                                                                   |                                                                                   |
| <b>Ct.Th</b><br>$\mu\text{m}$                             | <b>Group: p = 0.143</b><br>SHAM: 847 ± 16<br>SCI: 813 ± 16     | <b>Time: p &lt; 0.001</b><br>2 wk (a): 755 ± 17 <b>b,c*,d*</b><br>1 mo (b): 836 ± 22<br>2 mo (c): 873 ± 23<br>3 mo (d): 907 ± 18          | <b>Interaction: p = 0.685</b><br>For Means ± SEM<br>see Fig 2A    | NS                                                                                |
| <b>Ps.MS/BS</b><br>%                                      | <b>Group: p = 0.278</b><br>SHAM: 44 ± 2<br>SCI: 38 ± 4         | <b>Time: p &lt; .001</b><br>2 wk (a): 41 ± 3<br>1 mo (b): 29 ± 4 <b>c*,d*</b>                                                             | <b>Interaction: p = 0.004</b><br>For Means ± SEM<br>see Fig 2B    | SHAM 1 mo > SCI 1 mo †<br>SCI 1 mo < SHAM 2 wk ‡<br>SCI 1 mo < SHAM 2 mo ‡        |

|                                                                                    |                                                                                  |                                                                                                                                                                   |                                                                            |                                                                          |
|------------------------------------------------------------------------------------|----------------------------------------------------------------------------------|-------------------------------------------------------------------------------------------------------------------------------------------------------------------|----------------------------------------------------------------------------|--------------------------------------------------------------------------|
|                                                                                    |                                                                                  | 2 mo (c): $49 \pm 5$<br>3 mo (d): $50 \pm 6$                                                                                                                      |                                                                            | SCI 1 mo < SHAM 3 mo ‡<br>SCI 1 mo < SCI 2 mo ‡<br>SCI 1 mo < SCI 3 mo ‡ |
| <b>Ps.MAR</b><br><br><b><math>\mu\text{m}/\text{day}</math></b>                    | <b>Group: p = 0.598</b><br><br>SHAM: $1.30 \pm 0.04$<br><br>SCI: $1.35 \pm 0.06$ | <b>Time: p &lt; 0.001</b><br>2 wk (a): $1.50 \pm 0.08$ <b>d*</b><br>1 mo (b): $1.35 \pm 0.05$ <b>d*</b><br>2 mo (c): $1.27 \pm 0.06$<br>3 mo (d): $1.08 \pm 0.05$ | <b>Interaction: p = 0.543</b><br><br>For Means $\pm$ SEM<br><br>see Fig 2C | NS                                                                       |
| <b>Ps.BFR/BS</b><br><br><b><math>\mu\text{m}^3/\mu\text{m}^2/\text{day}</math></b> | <b>Group: p = 0.620</b><br><br>SHAM: $58 \pm 4$<br><br>SCI: $51 \pm 6$           | <b>Time: p = 0.018</b><br>2 wk (a): $59 \pm 6$<br>1 mo (b): $39 \pm 5$ <b>c</b><br>2 mo (c): $66 \pm 8$<br>3 mo (d): $57 \pm 8$                                   | <b>Interaction: p = 0.015</b><br><br>For Means $\pm$ SEM<br><br>see Fig 2D | SHAM 2 wk > SCI 1 mo ‡<br>SCI 1 mo < SCI 2 mo ‡<br>SCI 1 mo < SCI 3 mo † |
| <b><i><math>\mu\text{CT}</math> Analysis of Femoral Cancellous Morphology</i></b>  |                                                                                  |                                                                                                                                                                   |                                                                            |                                                                          |
| <b>vBMD</b><br><br><b><math>\text{g}/\text{cm}^3</math></b>                        | <b>Group: p &lt; 0.001</b><br><br>SHAM: $0.20 \pm 0.01$                          | <b>Time: p = 0.698</b><br>2 wk (a): $0.16 \pm 0.01$                                                                                                               | <b>Interaction: p = 0.856</b><br><br>For Means $\pm$ SEM                   | NS                                                                       |

|                                                           |                                                                                 |                                                                                                                                         |                                                                                               |                                                                                                                                                                   |
|-----------------------------------------------------------|---------------------------------------------------------------------------------|-----------------------------------------------------------------------------------------------------------------------------------------|-----------------------------------------------------------------------------------------------|-------------------------------------------------------------------------------------------------------------------------------------------------------------------|
|                                                           | SCI: $0.14 \pm 0.01$                                                            | 1 mo (b): $0.18 \pm 0.01$<br>2 mo (c): $0.18 \pm 0.01$<br>3 mo (d): $0.17 \pm 0.01$                                                     | see Fig 3A                                                                                    |                                                                                                                                                                   |
| <b>BV/TV</b><br><br>%<br><br>(whole ROI)                  | <b>Group: p &lt; 0.001</b><br><br>SHAM: $7.9 \pm 0.5$<br><br>SCI: $4.4 \pm 0.4$ | <b>Time: p = 0.067</b><br>2 wk (a): $4.9 \pm 0.6$<br>1 mo (b): $6.5 \pm 0.8$<br>2 mo (c): $7.3 \pm 0.8$<br>3 mo (d): $6.6 \pm 0.5$      | <b>Interaction: p = 0.750</b><br><br>For Means $\pm$ SEM<br><br>see Fig 3B                    | NS                                                                                                                                                                |
| <b>BV/TV</b><br><br>%<br><br>(distal thirds,<br><br>2 wk) | <b>Group: p &lt; 0.001</b><br><br>SHAM: $6.3 \pm 0.7$<br><br>SCI: $3.0 \pm 0.5$ | <b>Location: p &lt; 0.001</b><br>dist (a): $7.9 \pm 0.8$ <b>b*,c*</b><br>mid (b): $3.8 \pm 0.5$ <b>a*,c*</b><br>prox (c): $1.5 \pm 0.3$ | <b>Interaction: p = 0.003</b><br><br>For Means $\pm$ SEM<br><br>see Online Resource<br><br>5A | SHAM dist > <i>ALL OTHERS</i> ‡<br>SCI dist > SHAM prox †<br>SCI dist > SCI prox ‡<br>SHAM mid > SHAM prox †<br>SHAM mid > SCI prox ‡<br>SHAM prox < SCI distal † |
| <b>BV/TV</b><br><br>%                                     | <b>Group: p &lt; 0.001</b><br><br>SHAM: $7.6 \pm 0.8$                           | <b>Location: p &lt; 0.001</b><br>dist (a): $9.4 \pm 1.0$ <b>b*,c*</b>                                                                   | <b>Interaction: p = 0.478</b><br><br>For Means $\pm$ SEM                                      | NS                                                                                                                                                                |

|                                               |                                                                             |                                                                                                                                          |                                                                                   |    |
|-----------------------------------------------|-----------------------------------------------------------------------------|------------------------------------------------------------------------------------------------------------------------------------------|-----------------------------------------------------------------------------------|----|
| (distal thirds,<br>1 mo)                      | SCI: $3.9 \pm 0.7$                                                          | mid (b): $5.7 \pm 0.9$ <b>a*,c</b><br>prox (c): $2.7 \pm 0.5$                                                                            | see Online Resource<br>5B                                                         |    |
| <b>BV/TV</b><br>%<br>(distal thirds,<br>2 mo) | <b>Group: p = 0.001</b><br>SHAM: $8.3 \pm 1.0$<br>SCI: $5.1 \pm 0.8$        | <b>Location: p &lt; 0.001</b><br>dist (a): $10.8 \pm 1.1$ <b>b*,c*</b><br>mid (b): $6.4 \pm 0.9$ <b>a*,c*</b><br>prox (c): $2.9 \pm 0.6$ | <b>Interaction: p = 0.120</b><br>For Means $\pm$ SEM<br>see Online Resource<br>5C | NS |
| <b>BV/TV</b><br>%<br>(distal thirds,<br>3 mo) | <b>Group: p = 0.010</b><br>SHAM: $6.7 \pm 0.9$<br>SCI: $5.0 \pm 0.6$        | <b>Location: p &lt; 0.001</b><br>dist (a): $10.1 \pm 0.7$ <b>b*,c*</b><br>mid (b): $5.1 \pm 0.6$ <b>a*,c*</b><br>prox (c): $2.4 \pm 0.4$ | <b>Interaction: p = 0.159</b><br>For Means $\pm$ SEM<br>see Online Resource<br>5D | NS |
| <b>Tb.N</b><br>#/mm                           | <b>Group: p &lt; 0.001</b><br>SHAM: $0.73 \pm 0.04$<br>SCI: $0.43 \pm 0.04$ | <b>Time: p = 0.315</b><br>2 wk (a): $0.52 \pm 0.05$<br>1 mo (b): $0.58 \pm 0.07$<br>2 mo (c): $0.67 \pm 0.07$                            | <b>Interaction: p = 0.648</b><br>For Means $\pm$ SEM<br>see Fig 3C                | NS |

|                                 |                                                                              |                                                                                                                                                                      |                                                                        |                                                                                                                                               |
|---------------------------------|------------------------------------------------------------------------------|----------------------------------------------------------------------------------------------------------------------------------------------------------------------|------------------------------------------------------------------------|-----------------------------------------------------------------------------------------------------------------------------------------------|
|                                 |                                                                              | 3 mo (d): 0.59 ± 0.05                                                                                                                                                |                                                                        |                                                                                                                                               |
| <b>Tb.Th</b><br><br><b>mm</b>   | <b>Group: p = 0.112</b><br><br>SHAM: 0.105 ± 0.001<br><br>SCI: 0.100 ± 0.002 | <b>Time: p &lt; 0.001</b><br><br>2 wk (a): 0.094 ± 0.002 <b>b*,c*d*</b><br><br>1 mo (b): 0.102 ± 0.002<br><br>2 mo (c): 0.109 ± 0.002<br><br>3 mo (d): 0.110 ± 0.002 | <b>Interaction: p = 0.159</b><br><br>For Means ± SEM<br><br>see Fig 3D | NS                                                                                                                                            |
| <b>Tb.Sp</b><br><br><b>mm</b>   | <b>Group: p = 0.013</b><br><br>SHAM: 0.96 ± 0.04<br><br>SCI: 1.12 ± 0.05     | <b>Time: p = .324</b><br><br>2 wk (a): 1.02 ± 0.06<br><br>1 mo (b): 1.00 ± 0.07<br><br>2 mo (c): 1.01 ± 0.07<br><br>3 mo (d): 1.16 ± 0.06                            | <b>Interaction: p = .714</b><br><br>For Means ± SEM<br><br>see Fig 3E  | NS                                                                                                                                            |
| <b>Tb.Pf</b><br><br><b>#/mm</b> | <b>Group: p &lt; 0.001</b><br><br>SHAM: 14.9 ± 0.4<br><br>SCI: 19.0 ± 0.7    | <b>Time: p &lt; 0.001</b><br><br>2 wk (a): 20.1 ± 0.9 <b>b*,c*,d*</b><br><br>1 mo (b): 16.9 ± 0.8 <b>d</b><br><br>2 mo (c): 15.0 ± 0.7<br><br>3 mo (d): 13.8 ± 0.5   | <b>Interaction: p = 0.016</b><br><br>For Means ± SEM<br><br>see Fig 3F | SHAM 2 wk < SCI 2 wk ‡<br><br>SCI 2 wk > SHAM 1 mo ‡<br><br>SCI 2 wk > SHAM 2 mo ‡<br><br>SCI 2 wk > SHAM 3 mo ‡<br><br>SCI 2 wk > SCI 1 mo † |



|                                                           |                                                                         |                                                                                                                                                   |                                                                        |                                                                                                                                                             |
|-----------------------------------------------------------|-------------------------------------------------------------------------|---------------------------------------------------------------------------------------------------------------------------------------------------|------------------------------------------------------------------------|-------------------------------------------------------------------------------------------------------------------------------------------------------------|
|                                                           |                                                                         |                                                                                                                                                   |                                                                        | SCI 2 wk > SCI 2 mo ‡<br>SCI 2 wk > SCI 3 mo ‡<br>SCI 1 mo > SHAM 2 mo †<br>SCI 1 mo > SHAM 3 mo ‡                                                          |
| <b><i>μCT Analysis of Femoral Cortical Morphology</i></b> |                                                                         |                                                                                                                                                   |                                                                        |                                                                                                                                                             |
| <b>Distal Tt.Ar</b><br><br><b>mm<sup>2</sup></b>          | <b>Group: p = 0.009</b><br><br>SHAM: 18.3 ± 0.3<br><br>SCI: 17.4 ± 0.3  | <b>Time: p = 0.003</b><br><br>2 wk (a): 17.0 ± 0.3 <b>c*,d</b><br>1 mo (b): 17.8 ± 0.3<br>2 mo (c): 18.8 ± 0.4<br>3 mo (d): 18.3 ± 0.5            | <b>Interaction: p = 0.742</b><br><br>For Means ± SEM<br><br>see Fig 4A | NS                                                                                                                                                          |
| <b>Distal Ct.Ar</b><br><br><b>mm<sup>2</sup></b>          | <b>Group: p &lt; 0.001</b><br><br>SHAM: 7.1 ± 0.1<br><br>SCI: 6.7 ± 0.1 | <b>Time: p &lt; 0.001</b><br><br>2 wk (a): 6.6 ± 0.1 <b>c,d*</b><br>1 mo (b): 6.7 ± 0.1 <b>c,d*</b><br>2 mo (c): 7.1 ± 0.1<br>3 mo (d): 7.3 ± 0.2 | <b>Interaction: p = 0.047</b><br><br>For Means ± SEM<br><br>see Fig 4B | SHAM 2 wk < SHAM 2 mo †<br>SHAM 2 wk < SHAM 3 mo ‡<br>SCI 2 wk < SHAM 2 mo ‡<br>SCI 2 wk < SHAM 3 mo ‡<br>SHAM 1 mo < SHAM 3 mo ‡<br>SCI 1 mo < SHAM 2 mo ‡ |

|                                                         |                                                                          |                                                                                                                                            |                                                                        |                                                                                                       |
|---------------------------------------------------------|--------------------------------------------------------------------------|--------------------------------------------------------------------------------------------------------------------------------------------|------------------------------------------------------------------------|-------------------------------------------------------------------------------------------------------|
|                                                         |                                                                          |                                                                                                                                            |                                                                        | SCI 1 mo < SHAM 3 mo ‡<br>SHAM 2 mo < SHAM 3 mo ‡<br>SCI 2 mo < SHAM 3 mo ‡<br>SHAM 3 mo > SCI 3 mo ‡ |
| <b>Distal Ma.Ar</b><br><br><b>mm<sup>2</sup></b>        | <b>Group: p = 0.410</b><br><br>SHAM: 11.1 ± 0.2<br><br>SCI: 10.8 ± 0.2   | <b>Time: p = 0.014</b><br><br>2 wk (a): 10.3 ± 0.2 c*<br><br>1 mo (b): 11.1 ± 0.3<br><br>2 mo (c): 11.8 ± 0.4<br><br>3 mo (d): 11.0 ± 0.5  | <b>Interaction: p = 0.978</b><br><br>For Means ± SEM<br><br>see Fig 4C | NS                                                                                                    |
| <b>Distal</b><br><br><b>Ct.Ar/Tt.Ar</b><br><br><b>%</b> | <b>Group: p = 0.006</b><br><br>SHAM: 0.39 ± 0.01<br><br>SCI: 0.37 ± 0.01 | <b>Time: p = 0.026</b><br><br>2 wk (a): 0.39 ± 0.01<br><br>1 mo (b): 0.37 ± 0.01<br><br>2 mo (c): 0.37 ± 0.01<br><br>3 mo (d): 0.40 ± 0.01 | <b>Interaction: p = 0.964</b><br><br>For Means ± SEM<br><br>see Fig 4D | NS                                                                                                    |
| <b>Distal Ct.Th</b><br><br><b>mm</b>                    | <b>Group: p &lt; 0.001</b><br><br>SHAM: 0.511 ± 0.005                    | <b>Time: p = 0.001</b><br><br>2 wk (a): 0.496 ± 0.005 d                                                                                    | <b>Interaction: p = 0.548</b><br><br>For Means ± SEM                   | NS                                                                                                    |

|                                                                   |                                                                                      |                                                                                                                                                                                                       |                                                                            |                                                                              |
|-------------------------------------------------------------------|--------------------------------------------------------------------------------------|-------------------------------------------------------------------------------------------------------------------------------------------------------------------------------------------------------|----------------------------------------------------------------------------|------------------------------------------------------------------------------|
|                                                                   | SCI: $0.483 \pm 0.006$                                                               | 1 mo (b): $0.483 \pm 0.007$ <b>d*</b><br>2 mo (c): $0.485 \pm 0.010$ <b>d*</b><br>3 mo (d): $0.528 \pm 0.012$                                                                                         | see Fig 4E                                                                 |                                                                              |
| <b>Distal vTMD</b><br><br><b>g/cm<sup>3</sup></b>                 | <b>Group: p = 0.159</b><br><br>SHAM: $1.346 \pm 0.007$<br><br>SCI: $1.338 \pm 0.005$ | <b>Time: p &lt; 0.001</b><br><br>2 wk (a): $1.316 \pm 0.005$ <b>c,d*</b><br><br>1 mo (b): $1.333 \pm 0.006$ <b>d*</b><br><br>2 mo (c): $1.342 \pm 0.007$ <b>d*</b><br><br>3 mo (d): $1.399 \pm 0.009$ | <b>Interaction: p = 0.235</b><br><br>For Means $\pm$ SEM<br><br>see Fig 4F | NS                                                                           |
| <b>Diaphysis</b><br><br><b>Tt.Ar</b><br><br><b>mm<sup>2</sup></b> | <b>Group: p = 0.167</b><br><br>SHAM: $12.3 \pm 0.2$<br><br>SCI: $12.0 \pm 0.2$       | <b>Time: p = 0.010</b><br><br>2 wk (a): $11.8 \pm 0.2$<br><br>1 mo (b): $12.1 \pm 0.2$<br><br>2 mo (c): $12.7 \pm 0.2$ <b>a*</b><br><br>3 mo (d): $12.2 \pm 0.2$                                      | <b>Interaction: p = 0.667</b><br><br>For Means $\pm$ SEM<br><br>see Fig 4G | NS                                                                           |
| <b>Diaphysis</b><br><br><b>Ct.Ar</b><br><br><b>mm<sup>2</sup></b> | <b>Group: p = 0.002</b><br><br>SHAM: $7.8 \pm 0.1$<br><br>SCI: $7.4 \pm 0.1$         | <b>Time: p &lt; 0.001</b><br><br>2 wk (a): $7.2 \pm 0.1$ <b>b*,c*,d*</b><br><br>1 mo (b): $7.7 \pm 0.1$                                                                                               | <b>Interaction: p = 0.012</b><br><br>For Means $\pm$ SEM<br><br>see Fig 4H | SHAM 2 wk < SHAM 2 mo ‡<br>SHAM 2 wk < SHAM 3 mo ‡<br>SCI 2 wk < SHAM 2 mo ‡ |

|                                                                   |                                                                                     |                                                                                                                                                          |                                                                            |                                                                                                                                                |
|-------------------------------------------------------------------|-------------------------------------------------------------------------------------|----------------------------------------------------------------------------------------------------------------------------------------------------------|----------------------------------------------------------------------------|------------------------------------------------------------------------------------------------------------------------------------------------|
|                                                                   |                                                                                     | 2 mo (c): $7.9 \pm 0.1$<br>3 mo (d): $7.9 \pm 0.2$                                                                                                       |                                                                            | SCI 2 wk < SHAM 3 mo ‡<br>SHAM 3 mo > SCI 3 mo †                                                                                               |
| <b>Diaphysis</b><br><br><b>Ma.Ar</b><br><br><b>mm<sup>2</sup></b> | <b>Group: p = 0.149</b><br><br>SHAM: $4.47 \pm 0.09$<br><br>SCI: $4.60 \pm 0.09$    | <b>Time: p = 0.101</b><br><br>2 wk (a): $4.57 \pm 0.12$<br>1 mo (b): $4.43 \pm 0.12$<br>2 mo (c): $4.81 \pm 0.15$<br>3 mo (d): $4.37 \pm 0.11$           | <b>Interaction: p = 0.043</b><br><br>For Means $\pm$ SEM<br><br>see Fig 4I | SCI 1 mo < SCI 2 mo †<br><br>SCI 2 mo > SHAM 3 mo †                                                                                            |
| <b>Diaphysis</b><br><br><b>Ct.Ar/Tt.Ar</b><br><br><b>%</b>        | <b>Group: p = 0.001</b><br><br>SHAM: $0.64 \pm 0.01$<br><br>SCI: $0.62 \pm 0.01$    | <b>Time: p = 0.015</b><br><br>2 wk (a): $0.62 \pm 0.01$ <b>d*</b><br>1 mo (b): $0.63 \pm 0.01$<br>2 mo (c): $0.62 \pm 0.01$<br>3 mo (d): $0.64 \pm 0.01$ | <b>Interaction: p = 0.001</b><br><br>For Means $\pm$ SEM<br><br>see Fig 4J | SHAM 2 wk < SHAM 3 mo †<br><br>SCI 2 wk < SHAM 3 mo ‡<br><br>SCI 1 mo > SCI 2 mo †<br><br>SHAM 2 mo > SCI 2 mo ‡<br><br>SCI 2 mo < SHAM 3 mo ‡ |
| <b>Diaphysis</b><br><br><b>Ct.Th</b><br><br><b>mm<sup>2</sup></b> | <b>Group: p &lt; 0.001</b><br><br>SHAM: $0.79 \pm 0.01$<br><br>SCI: $0.76 \pm 0.01$ | <b>Time: p &lt; 0.001</b><br><br>2 wk (a): $0.74 \pm 0.01$ <b>b,c*,d*</b><br>1 mo (b): $0.78 \pm 0.01$<br>2 mo (c): $0.79 \pm 0.01$                      | <b>Interaction: p = 0.01</b><br><br>For Means $\pm$ SEM<br><br>see Fig 4K  | SHAM 2 wk < SHAM 2 mo ‡<br><br>SHAM 2 wk < SHAM 3 mo ‡<br><br>SCI 2 wk < SHAM 2 mo ‡<br><br>SCI 2 wk < SHAM 3 mo ‡                             |

|                                                                    |                                                                                      |                                                                                                                                                                                               |                                                                            |                                                                                                                                                                                                                                          |
|--------------------------------------------------------------------|--------------------------------------------------------------------------------------|-----------------------------------------------------------------------------------------------------------------------------------------------------------------------------------------------|----------------------------------------------------------------------------|------------------------------------------------------------------------------------------------------------------------------------------------------------------------------------------------------------------------------------------|
|                                                                    |                                                                                      | 3 mo (d): $0.80 \pm 0.02$                                                                                                                                                                     |                                                                            | SCI 1 mo < SHAM 3 mo †<br>SHAM 2 mo > SCI 2 mo †<br>SCI 2 mo < SHAM 3 mo ‡<br>SHAM 3 mo > SCI 3 mo †                                                                                                                                     |
| <b>Diaphysis</b><br><br><b>vTMD</b><br><br><b>g/cm<sup>3</sup></b> | <b>Group: p = 0.001</b><br><br>SHAM: $1.515 \pm 0.006$<br><br>SCI: $1.497 \pm 0.004$ | <b>Time: p &lt; 0.001</b><br><br>2 wk (a): $1.479 \pm 0.004$ <b>b*,c*,d*</b><br>1 mo (b): $1.506 \pm 0.004$ <b>d*</b><br>2 mo (c): $1.512 \pm 0.009$ <b>d*</b><br>3 mo (d): $1.550 \pm 0.009$ | <b>Interaction: p = 0.027</b><br><br>For Means $\pm$ SEM<br><br>see Fig 4L | SHAM 2 wk < SHAM 2 mo ‡<br>SHAM 2 wk < SHAM 3 mo ‡<br>SHAM 2 wk < SCI 3 mo †<br>SCI 2 wk < SHAM 2 mo ‡<br>SCI 2 wk < SHAM 3 mo ‡<br>SCI 2 wk < SCI 3 mo †<br>SHAM 1 mo < SHAM 3 mo ‡<br>SCI 1 mo < SHAM 3 mo ‡<br>SCI 2 mo < SHAM 3 mo ‡ |
| <b><i>Bone Mechanical Testing</i></b>                              |                                                                                      |                                                                                                                                                                                               |                                                                            |                                                                                                                                                                                                                                          |

|                                                   |                                                                          |                                                                                                                                            |                                                                        |    |
|---------------------------------------------------|--------------------------------------------------------------------------|--------------------------------------------------------------------------------------------------------------------------------------------|------------------------------------------------------------------------|----|
| <b>Distal<br/>Maximum<br/>Load<br/>N</b>          | <b>Group: p &lt; 0.001</b><br><br>SHAM: 99 ± 2<br><br>SCI: 81 ± 3        | <b>Time: p = 0.001</b><br><br>2 wk (a): 81 ± 5 <b>c*,d*</b><br><br>1 mo (b): 86 ± 4<br><br>2 mo (c): 99 ± 3<br><br>3 mo (d): 96 ± 3        | <b>Interaction: p = 0.390</b><br><br>For Means ± SEM<br><br>see Fig 5A | NS |
| <b>Distal<br/>Displacement<br/>mm</b>             | <b>Group: p = 0.001</b><br><br>SHAM: 1.45 ± 0.07<br><br>SCI: 1.15 ± 0.05 | <b>Time: p = 0.321</b><br><br>2 wk (a): 1.17 ± 0.11<br><br>1 mo (b): 1.36 ± 0.11<br><br>2 mo (c): 1.31 ± 0.08<br><br>3 mo (d): 1.38 ± 0.07 | <b>Interaction: p = 0.475</b><br><br>For Means ± SEM<br><br>see Fig 5B | NS |
| <b>Distal<br/>Energy to<br/>Fracture<br/>N*mm</b> | <b>Group: p &lt; 0.001</b><br><br>SHAM: 84 ± 4<br><br>SCI: 58 ± 4        | <b>Time: p = 0.023</b><br><br>2 wk (a): 58 ± 7 <b>c,d</b><br><br>1 mo (b): 70 ± 7<br><br>2 mo (c): 78 ± 6<br><br>3 mo (d): 78 ± 5          | <b>Interaction: p = 0.439</b><br><br>For Means ± SEM<br><br>see Fig 5C | NS |

|                                            |                                                                          |                                                                                                                                                 |                                                                        |    |
|--------------------------------------------|--------------------------------------------------------------------------|-------------------------------------------------------------------------------------------------------------------------------------------------|------------------------------------------------------------------------|----|
| <b>Distal<br/>Stiffness<br/>N/mm</b>       | <b>Group: p = 0.352</b><br><br>SHAM: 66 ± 4<br><br>SCI: 70 ± 3           | <b>Time: p = 0.605</b><br><br>2 wk (a): 65 ± 6<br><br>1 mo (b): 66 ± 4<br><br>2 mo (c): 73 ± 4<br><br>3 mo (d): 68 ± 4                          | <b>Interaction: p = 0.399</b><br><br>For Means ± SEM<br><br>see Fig 5D | NS |
| <b>Midshaft<br/>Maximum<br/>Load<br/>N</b> | <b>Group: p &lt; 0.001</b><br><br>SHAM: 250 ± 7<br><br>SCI: 217 ± 7      | <b>Time: p &lt; 0.001</b><br><br>2 wk (a): 193 ± 5 <b>b*,c*,d*</b><br><br>1 mo (b): 253 ± 10<br><br>2 mo (c): 254 ± 8<br><br>3 mo (d): 238 ± 14 | <b>Interaction: p = 0.148</b><br><br>For Means ± SEM<br><br>see Fig 5E | NS |
| <b>Midshaft<br/>Displacement<br/>mm</b>    | <b>Group: p = 0.501</b><br><br>SHAM: 0.82 ± 0.03<br><br>SCI: 0.78 ± 0.05 | <b>Time: p = 0.707</b><br><br>2 wk (a): 0.86 ± 0.03<br><br>1 mo (b): 0.76 ± 0.06<br><br>2 mo (c): 0.80 ± 0.05<br><br>3 mo (d): 0.79 ± 0.09      | <b>Interaction: p = 0.502</b><br><br>For Means ± SEM<br><br>see Fig 5F | NS |

|                                                     |                                                                           |                                                                                                                                                                                |                                                                        |                                                                                                                                                |
|-----------------------------------------------------|---------------------------------------------------------------------------|--------------------------------------------------------------------------------------------------------------------------------------------------------------------------------|------------------------------------------------------------------------|------------------------------------------------------------------------------------------------------------------------------------------------|
| <b>Midshaft<br/>Energy to<br/>Fracture<br/>N*mm</b> | <b>Group: p = 0.001</b><br><br>SHAM: 118 ± 5<br><br>SCI: 93 ± 6           | <b>Time: p = 0.462</b><br><br>2 wk (a): 102 ± 5<br><br>1 mo (b): 115 ± 10<br><br>2 mo (c): 104 ± 7<br><br>3 mo (d): 102 ± 10                                                   | <b>Interaction: p = 0.316</b><br><br>For Means ± SEM<br><br>see Fig 5G | NS                                                                                                                                             |
| <b>Midshaft<br/>Stiffness<br/>N/mm</b>              | <b>Group: p = 0.202</b><br><br>SHAM: 367 ± 13<br><br>SCI: 335 ± 18        | <b>Time: p = 0.002</b><br><br>2 wk (a): 288 ± 14 <b>b*,c*</b><br><br>1 mo (b): 386 ± 15<br><br>2 mo (c): 387 ± 15<br><br>3 mo (d): 358 ± 32                                    | <b>Interaction: p = 0.708</b><br><br>For Means ± SEM<br><br>see Fig 5H | NS                                                                                                                                             |
| <b><i>Serum Measurements</i></b>                    |                                                                           |                                                                                                                                                                                |                                                                        |                                                                                                                                                |
| <b>TRAP5b<br/>% Δ from<br/>baseline</b>             | <b>Group: p = 0.415</b><br><br>SHAM: -0.03 ± 0.05<br><br>SCI: 0.03 ± 0.05 | <b>Time: p &lt; 0.001</b><br><br>2 wk (a): 0.01 ± 0.06 <b>c,d*</b><br><br>1 mo (b): 0.07 ± 0.04 <b>d*</b><br><br>2 mo (c): 0.20 ± 0.07 <b>d*</b><br><br>3 mo (d): -0.31 ± 0.04 | <b>Interaction: p = 0.005</b><br><br>For Means ± SEM<br><br>see Fig 6A | SHAM 2 wk < SHAM 2 mo ‡<br><br>SHAM 2 wk < SCI 2 wk †<br><br>SCI 2 wk > SHAM 3 mo ‡<br><br>SCI 2 wk > SCI 3 mo ‡<br><br>SHAM 1 mo > SCI 3 mo † |



|                                                             |                                                                              |                                                                                                                                                               |                                                                           |                                                                                                                                                                                                                                                                    |
|-------------------------------------------------------------|------------------------------------------------------------------------------|---------------------------------------------------------------------------------------------------------------------------------------------------------------|---------------------------------------------------------------------------|--------------------------------------------------------------------------------------------------------------------------------------------------------------------------------------------------------------------------------------------------------------------|
|                                                             |                                                                              |                                                                                                                                                               |                                                                           | SCI 1 mo > SHAM 3 mo ‡<br>SCI 1 mo > SCI 3 mo ‡<br>SHAM 2 mo > SHAM 3 mo ‡<br>SHAM 2 mo > SCI 3 mo ‡<br>SCI 2 mo > SHAM 3 mo †<br>SCI 2 mo > SCI 3 mo ‡                                                                                                            |
| <b>Leptin</b><br><br><b>% Δ from</b><br><br><b>baseline</b> | <b>Group: p &lt; 0.001</b><br><br>SHAM: 0.43 ± 0.10<br><br>SCI: -0.13 ± 0.05 | <b>Time: p &lt; 0.001</b><br><br>2 wk (a): -0.28 ± 0.03 <b>c*,d*</b><br>1 mo (b): -0.21 ± 0.06 <b>c*,d*</b><br>2 mo (c): 0.64 ± 0.12<br>3 mo (d): 0.57 ± 0.18 | <b>Interaction: p &lt; 0.001</b><br><br>For Means ± SEM<br><br>see Fig 6B | SHAM 2 wk < SHAM 2 mo ‡<br>SHAM 2 wk < SHAM 3 mo ‡<br>SCI 2 wk < SHAM 2 mo ‡<br>SCI 2 wk < SHAM 2 mo ‡<br>SCI 2 wk < SCI 2 mo ‡<br>SHAM 1 mo < SHAM 2 mo ‡<br>SHAM 1 mo < SHAM 3 mo ‡<br>SCI 1 mo < SHAM 2 mo ‡<br>SCI 1 mo < SHAM 3 mo ‡<br>SCI 1 mo < SCI 2 mo † |

|                                                                 |                                                                            |                                                                                                                                                 |                                                                        |                                                                                                      |
|-----------------------------------------------------------------|----------------------------------------------------------------------------|-------------------------------------------------------------------------------------------------------------------------------------------------|------------------------------------------------------------------------|------------------------------------------------------------------------------------------------------|
|                                                                 |                                                                            |                                                                                                                                                 |                                                                        | SHAM 2 mo > SCI 2 mo ‡<br>SHAM 2 mo > SCI 3 mo ‡<br>SCI 2 mo < SHAM 3 mo ‡<br>SHAM 3 mo > SCI 3 mo ‡ |
| <b>Testosterone</b><br><br><b>ng/ml</b>                         | <b>Group: p &lt; 0.001</b><br><br>SHAM: 2.8 ± 0.2<br><br>SCI: 1.7 ± 0.2    | <b>Time: p = 0.015</b><br><br>2 wk (a): 1.8 ± 0.2 <b>b,d*</b><br>1 mo (b): 2.5 ± 0.2<br>2 mo (c): 2.2 ± 0.3<br>3 mo (d): 3.0 ± 0.7              | <b>Interaction: p = 0.367</b><br><br>For Means ± SEM<br><br>see Fig 6C | NS                                                                                                   |
| <b>Sclerostin</b><br><br><b>% Δ from</b><br><br><b>baseline</b> | <b>Group: p = 0.153</b><br><br>SHAM: -0.17 ± 0.02<br><br>SCI: -0.11 ± 0.03 | <b>Time: p &lt; 0.001</b><br><br>2 wk (a): -0.07 ± 0.03 <b>c*</b><br>1 mo (b): -0.24 ± 0.03<br>2 mo (c): -0.17 ± 0.05<br>3 mo (d): -0.16 ± 0.03 | <b>Interaction: p = 0.818</b><br><br>For Means ± SEM<br><br>see Fig 6D | NS                                                                                                   |
| <b>P1NP</b>                                                     | <b>Group: p = 0.972</b><br><br>SHAM: -0.64 ± 0.03                          | <b>Time: p &lt; 0.001</b><br><br>2 wk (a): -0.53 ± 0.03 <b>c*,d*</b>                                                                            | <b>Interaction: p = 0.078</b><br><br>For Means ± SEM                   | NS                                                                                                   |

|                                                |                                                                            |                                                                                                                                                                        |                                                                    |    |
|------------------------------------------------|----------------------------------------------------------------------------|------------------------------------------------------------------------------------------------------------------------------------------------------------------------|--------------------------------------------------------------------|----|
| <b>% Δ from baseline</b>                       | SCI: $-0.65 \pm 0.03$                                                      | 1 mo (b): $-0.46 \pm 0.04$ <b>c*,d*</b><br>2 mo (c): $-0.74 \pm 0.02$<br>3 mo (d): $-0.82 \pm 0.01$                                                                    | see Fig 6E                                                         |    |
| <b>Osteocalcin</b><br><b>% Δ from baseline</b> | <b>Group: p = 0.213</b><br>SHAM: $-0.29 \pm 0.04$<br>SCI: $-0.23 \pm 0.04$ | <b>Time: p &lt; 0.001</b><br>2 wk (a): $-0.20 \pm 0.04$ <b>c</b><br>1 mo (b): $-0.11 \pm 0.06$ <b>c,d*</b><br>2 mo (c): $-0.31 \pm 0.05$<br>3 mo (d): $-0.39 \pm 0.04$ | <b>Interaction: p = 0.617</b><br>For Means $\pm$ SEM<br>see Fig 6F | NS |

Values reported are Means  $\pm$  SEM. P-values for main effects and interactions are listed in the respective columns. Tukey's *post hoc* tests were performed for multiple comparisons among groups. For time, letters (a – d) indicate differences among timepoints at  $p < 0.05$  or \*  $p < 0.01$  (a = vs 2 wk, b = vs 1 mo, c = vs 2 mo, d = vs 3 mo). For interactions, † indicate  $p < 0.05$  and ‡ indicate  $p < 0.01$  for respectively labeled SHAM and SCI groups. Only significant *post hoc* values are reported. NS = no significant interaction.

Note: P-values for distal thirds BV/TV were derived from 2 (Group) x 3 [Location (Distal = a, Middle = b, Proximal = c)] ANOVAs. Serum measurements are reported as the percentage change from baseline, except for testosterone which is the actual concentration (due to insufficient sera to determine baseline values on all samples).
