# Supplementary material
Source: PubMed Central journal article supplement (PMC8349506)
Supplement: NIHMS1728931-supplement-Online_Resource_8.pdf [file NIHMS1728931-supplement-Online_Resource_8.pdf]

**Online Resource 8.** Pre-surgical serum measurements from SHAM and SCI animals.

|             | <b>TRAP5b</b><br><b>(U/L)</b> | <b>Leptin</b><br><b>(ng/ml)</b> | <b>Testosterone</b><br><b>(ng/ml)</b> | <b>Sclerostin</b><br><b>(ng/ml)</b> | <b>P1NP</b><br><b>(ng/ml)</b> | <b>Osteocalcin</b><br><b>(ng/ml)</b> |
|-------------|-------------------------------|---------------------------------|---------------------------------------|-------------------------------------|-------------------------------|--------------------------------------|
| <b>SHAM</b> | 4.6 ± 0.2                     | 8.5 ± 0.9                       | 1.4 ± 0.1                             | 422 ± 20                            | 93 ± 6                        | 460 ± 16                             |
| <b>SCI</b>  | 4.3 ± 0.2                     | 8.8 ± 0.6                       | 1.4 ± 0.2                             | 411 ± 19                            | 87 ± 5                        | 448 ± 14                             |

Values are Means ± SE, n=40/group. No differences were present between groups for any serum measurement at baseline.
